# Supplementary material
Source: PubMed Central journal article supplement (PMC10114595)

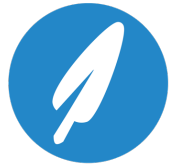

CAMBRIDGE  
Proofreading  
— & EDITING LLC

# EDITING CERTIFICATE

This document certifies that the manuscript listed below was edited by Cambridge Proofreading LLC for English grammar, punctuation, spelling, and style. We endeavoured to ensure that the authors' intended meaning was not altered during the review. All amendments were tracked with Microsoft Word's 'Track Changes' feature, allowing the authors full control over the changes made. We bear no responsibility for revisions made to the document after our edit on the date listed below.

**Document title:**

Clinical Evaluation of Reasons for Replacement of Amalgam  
vs Composite Posterior Restorations

**Document authors:**

Dr Ayah Al-Asmar

Date edited: 02/08/2023

Order number: 633-14-47

**For queries or verification contact [info@cambridgeproofreading.com](mailto:info@cambridgeproofreading.com)**

Cambridge Proofreading LLC is a registered company headquartered in Chicago, Illinois, with a global presence. Our Certificate of Good Standing can be found in the Illinois state business database.

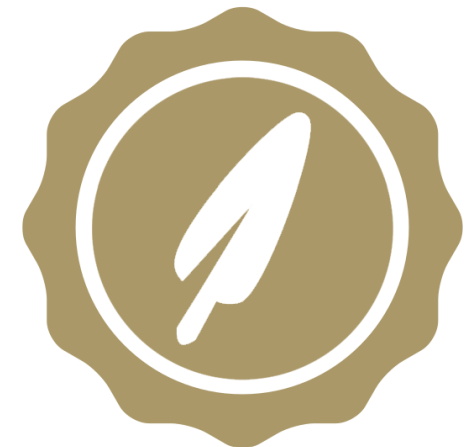

Supplement: mmc1.pdf [file mmc1.pdf]
